# Supplementary material for: A 20-year time-series of a freshwater lake reveals seasonal dynamics and environmental drivers of viral diversity, ecology, and evolution
Source: Research Square preprint supplement (doi:10.21203/rs.3.rs-3962026/v1), 2024-02-23
Supplement: Supplementary file 1 [file a20f62f57cf782f60b0352a8.xlsx]

## Sheet: Data S1
Supplementary Data S1 | AMG cluster abundance trend line charts. There are 578 AMG cluster abundance trend line charts in total. In each figure, there are three subpanels: 1) the metagenome distribution in each season across 20 years, 2) the yearly AMG cluster abundance trend line chart, 3) the seasonally (aggregated across 20 years) AMG cluster abundance trend line chart. The AMG cluster abundan…
Sub-table 1. AMG cluster summary table for 64 KOs with biogeochemical importance
KO	KO details	Metabolisms (mutiple metabolisms separated by '|')	Pathways (mutiple pathways separated by '|')	Module	Monthly pattern (aggregated across 20 years)	Yearly pattern (for each year)	Remarks
K00390	cysH; phosphoadenosine phosphosulfate reductase [EC:1.8.4.8 1.8.4.10]	Energy metabolism	Sulfur metabolism	Assimilatory sulfate reduction, sulfate => H2S	peak in Clearwater and Late Summer, distributed across all seasons	constantly found across all years	appear very frequently, distributed across all years
K00860	cysC; adenylylsulfate kinase [EC:2.7.1.25]	Nucleotide metabolism | Energy metabolism	Purine metabolism | Sulfur metabolism	Assimilatory sulfate reduction, sulfate => H2S	peak in Clearwater, distributed across all seasons	constantly found across all years	appear very frequently, distributed across all years
K01738	cysK; cysteine synthase [EC:2.5.1.47]	Amino acid metabolism | Energy metabolism	Cysteine and methionine metabolism | Sulfur metabolism	Cysteine biosynthesis, serine => cysteine	peak in Clearwater	constantly found across all years, mostly peak in Clearwater	appear very frequently, distributed across all years
K01912	paaK; phenylacetate-CoA ligase [EC:6.2.1.30]	Amino acid metabolism	Phenylalanine metabolism	Phenylacetate degradation, phenylaxetate => acetyl-CoA/succinyl-CoA	peak in Ice-on	many peak in Early Summer, constantly found across all years, seems to be biased due to high KO abundance in Ice-on in 2014	appear very frequently, distributed across all years
K01916	nadE; NAD+ synthase [EC:6.3.1.5]	Metabolism of cofactors and vitamins	Nicotinate and nicotinamide metabolism	NAD biosynthesis, aspartate => quinolinate => NAD | NAD biosynthesis, tryptophan => quinolinate => NAD	peak in Clearwater, but also have high abundance in all seasons except Spring	constantly found across all years	appear very frequently, distributed across all years
K02703	psbA; photosystem II P680 reaction center D1 protein [EC:1.10.3.9]	Energy metabolism	Photosynthesis	Photosystem II	peak in Late Summer	mostly peak in Late Summer	appear very frequently, distributed across all years
K02706	psbD; photosystem II P680 reaction center D2 protein [EC:1.10.3.9]	Energy metabolism	Photosynthesis	Photosystem II	peak in Late Summer	mostly peak in Late Summer	appear very frequently, distributed across all years
K04091	ssuD; alkanesulfonate monooxygenase [EC:1.14.14.5]	Energy metabolism	Sulfur metabolism		peak in Clearwater, but also have high abundance in all seasons except Spring and Ice-on	many peak in Clearwater and Late Summer	appear very frequently, distributed across all years
K05383	cpeT; CpeT protein	Energy metabolism	Photosynthesis - antenna proteins		peak in Clearwater	many peak in Clearwater, Early Summer and Late Summer	appear very frequently, distributed across all years
K09882	cobS; cobaltochelatase CobS [EC:6.6.1.2]	Metabolism of cofactors and vitamins	Porphyrin and chlorophyll metabolism	Cobalamin biosynthesis, aerobic, uroporphyrinogen III => precorrin 2 => cobyrinate a,c-diamide	peak in Late Summer	many peak in Late Summer	appear very frequently, distributed across all years
K09883	cobT; cobaltochelatase CobT [EC:6.6.1.2]	Metabolism of cofactors and vitamins	Porphyrin and chlorophyll metabolism	Cobalamin biosynthesis, aerobic, uroporphyrinogen III => precorrin 2 => cobyrinate a,c-diamide	peak in Ice-on	many peak in Early Summer and Late Summer; seems to be biased due to high KO abundance in Ice-on in 2005 and 2019	appear very frequently, distributed across all years
K10946	pmoC-amoC; methane/ammonia monooxygenase subunit C	Energy metabolism | Energy metabolism	Methane metabolism | Nitrogen metabolism	Methane oxidation, methanotroph, methane => formaldehyde | Nitrification, ammonia => nitrite | Complete nitrification, comammox, ammonia => nitrite => nitrate	peak in Fall	many peak in Fall	appear very frequently, distributed across all years
K16150	K16150; glycogen synthase [EC:2.4.1.11]	Carbohydrate metabolism	Starch and sucrose metabolism	Glycogen biosynthesis, glucose-1P => glycogen/starch	peak in Clearwater, Early Summer, and Late Summer	many peak in Late Summer	appear very frequently, distributed across all years
K19645	dfrB, dfr2; dihydrofolate reductase (trimethoprim resistance protein) [EC:1.5.1.3]	Metabolism of cofactors and vitamins | Metabolism of cofactors and vitamins	One carbon pool by folate | Folate biosynthesis		peak in Early Summer and Fall	many peak in Early Summer	appear very frequently, distributed across all years
K21164	sgcE7, ncsE7, kedE7; enediyne biosynthesis protein E7	Metabolism of terpenoids and polyketides	Biosynthesis of enediyne antibiotics	9-membered enediyne core biosynthesis, malonyl-CoA => 3-hydroxyhexadeca-4,6,8,10,12,14-hexaenoyl-ACP => 9-membered enediyne core	peak in Early Summer and Fall	many peak in Early Summer and Fall	appear very frequently, distributed across all years
K22227	ahbD; heme synthase	Metabolism of cofactors and vitamins	Porphyrin and chlorophyll metabolism	Heme biosynthesis, archaea, siroheme => heme	peak in Clearwater	many peak in Clearwater	appear very frequently, distributed across all years
K00101	lldD; L-lactate dehydrogenase (cytochrome) [EC:1.1.2.3]	Carbohydrate metabolism	Pyruvate metabolism		peak in Clearwater	peak in Clearwater in 2002, mostly 0 or empty	appear less frequently, overall pattern was mostly based on one or few years
K00122	FDH; formate dehydrogenase [EC:1.17.1.9]	Carbohydrate metabolism | Energy metabolism	Glyoxylate and dicarboxylate metabolism | Methane metabolism		peak in Early Summer	peak in Early Summer in 2013, mostly 0 or empty	appear less frequently, overall pattern was mostly based on one or few years
K00162	PDHB, pdhB; pyruvate dehydrogenase E1 component beta subunit [EC:1.2.4.1]	Carbohydrate metabolism | Carbohydrate metabolism | Carbohydrate metabolism	Glycolysis / Gluconeogenesis | Citrate cycle (TCA cycle) | Pyruvate metabolism	Pyruvate oxidation, pyruvate => acetyl-CoA	peak in Clearwater and Fall	peak in Clearwater in 2004, peak in Fall in 2009, peak in Fall in 2016	overall pattern was mostly based on several years
K00303	soxB; sarcosine oxidase, subunit beta [EC:1.5.3.1]	Amino acid metabolism	Glycine, serine and threonine metabolism		peak in Fall	peak in Fall in 2004	appear less frequently, overall pattern was mostly based on one or few years
K00368	nirK; nitrite reductase (NO-forming) [EC:1.7.2.1]	Energy metabolism	Nitrogen metabolism	Denitrification, nitrate => nitrogen	peak in Early Summer	peak in Early Summer in 2014	appear less frequently, overall pattern was mostly based on one or few years
K00406	ccoP; cytochrome c oxidase cbb3-type subunit III	Energy metabolism	Oxidative phosphorylation	Cytochrome c oxidase, cbb3-type	peak in Clearwater	peak in Clearwater in 2002	appear less frequently, overall pattern was mostly based on one or few years
K00422	E1.10.3.1; polyphenol oxidase [EC:1.10.3.1]	Amino acid metabolism | Biosynthesis of other secondary metabolites	Tyrosine metabolism | Isoquinoline alkaloid biosynthesis		peak in Clearwater	mostly peak in Clearwater	appear in some years, and disappear in some years
K00456	CDO1; cysteine dioxygenase [EC:1.13.11.20]	Amino acid metabolism | Metabolism of other amino acids	Cysteine and methionine metabolism | Taurine and hypotaurine metabolism		peak in Spring	peak in Spring in 2001, peak in Spring in 2011, peak in Spring in 2016	appear less frequently, overall pattern was mostly based on one or few years
K00459	ncd2, npd; nitronate monooxygenase [EC:1.13.12.16]	Energy metabolism	Nitrogen metabolism		peak in Clearwater, peak in Fall	peak in Clearwater in 2009, peak in Fall in 2009	appear less frequently, overall pattern was mostly based on one or few years
K00658	DLST, sucB; 2-oxoglutarate dehydrogenase E2 component (dihydrolipoamide succinyltransferase) [EC:2.3.1.61]	Carbohydrate metabolism | Amino acid metabolism | Amino acid metabolism	Citrate cycle (TCA cycle) | Lysine degradation | Tryptophan metabolism	Citrate cycle (TCA cycle, Krebs cycle) | Citrate cycle, second carbon oxidation, 2-oxoglutarate => oxaloacetate | Lysine degradation, lysine => saccharopine => acetoacetyl-CoA	peak in Late Summer	peak in Late Summer in 2017	appear less frequently, overall pattern was mostly based on one or few years
K00793	ribE, RIB5; riboflavin synthase [EC:2.5.1.9]	Metabolism of cofactors and vitamins	Riboflavin metabolism	Riboflavin biosynthesis, plants and bacteria, GTP => riboflavin/FMN/FAD | Riboflavin biosynthesis, fungi, GTP => riboflavin/FMN/FAD	peak in Early Summer and Fall	peak in Fall in 2002, peak in Early Summer in 2018	appear less frequently, overall pattern was mostly based on one or few years
K00873	PK, pyk; pyruvate kinase [EC:2.7.1.40]	Carbohydrate metabolism | Nucleotide metabolism | Carbohydrate metabolism	Glycolysis / Gluconeogenesis | Purine metabolism | Pyruvate metabolism	Glycolysis (Embden-Meyerhof pathway), glucose => pyruvate | Glycolysis, core module involving three-carbon compounds	peak in Late Summer	mostly peak in Late Summer	appear in some years, and disappear in some years
K00955	cysNC; bifunctional enzyme CysN/CysC [EC:2.7.7.4 2.7.1.25]	Nucleotide metabolism | Biosynthesis of other secondary metabolites | Metabolism of other amino acids | Energy metabolism	Purine metabolism | Monobactam biosynthesis | Selenocompound metabolism | Sulfur metabolism	Assimilatory sulfate reduction, sulfate => H2S	peak in Late Summer	peak in Late Summer in 2014	appear less frequently, overall pattern was mostly based on one or few years
K00957	cysD; sulfate adenylyltransferase subunit 2 [EC:2.7.7.4]	Nucleotide metabolism | Biosynthesis of other secondary metabolites | Metabolism of other amino acids | Energy metabolism	Purine metabolism | Monobactam biosynthesis | Selenocompound metabolism | Sulfur metabolism	Assimilatory sulfate reduction, sulfate => H2S	peak in Late Summer	mostly peak in Late Summer, seems to be biased due to high KO abundance in Spring in 2015	appear in many years, and disappear in some years
K00958	sat, met3; sulfate adenylyltransferase [EC:2.7.7.4]	Nucleotide metabolism | Biosynthesis of other secondary metabolites | Metabolism of other amino acids | Energy metabolism	Purine metabolism | Monobactam biosynthesis | Selenocompound metabolism | Sulfur metabolism	Assimilatory sulfate reduction, sulfate => H2S | Dissimilatory sulfate reduction, sulfate => H2S	peak in Late Summer	peak in Late Summer in 2015	appear less frequently, overall pattern was mostly based on one or few years
K01007	pps, ppsA; pyruvate, water dikinase [EC:2.7.9.2]	Carbohydrate metabolism | Energy metabolism | Energy metabolism	Pyruvate metabolism | Methane metabolism | Carbon fixation pathways in prokaryotes	Reductive citrate cycle (Arnon-Buchanan cycle) | Dicarboxylate-hydroxybutyrate cycle	peak in Fall	peak in Fall	appear in some years, and disappear in some years
K01011	TST, MPST, sseA; thiosulfate/3-mercaptopyruvate sulfurtransferase [EC:2.8.1.1 2.8.1.2]	Amino acid metabolism | Energy metabolism | Folding, sorting and degradation	Cysteine and methionine metabolism | Sulfur metabolism | Sulfur relay system		peak in Fall	peak in Late Summer in 2012, peak in Fall in 2015	appear less frequently, overall pattern was mostly based on one or few years
K01051	E3.1.1.11; pectinesterase [EC:3.1.1.11]	Carbohydrate metabolism	Pentose and glucuronate interconversions	Pectin degradation	peak in Late Summer	mostly peak in Late Summer	appear in many years, and disappear in some years
K01176	AMY, amyA, malS; alpha-amylase [EC:3.2.1.1]	Carbohydrate metabolism	Starch and sucrose metabolism		peak in Clearwater, Early Summer, and Late Summer	peak in Late Summer in 2014, peak in Early Summer in 2017, peak in Clearwater in 2018, mostly 0 or empty	appear less frequently, overall pattern was mostly based on one or few years
K01647	CS, gltA; citrate synthase [EC:2.3.3.1]	Carbohydrate metabolism | Carbohydrate metabolism	Citrate cycle (TCA cycle) | Glyoxylate and dicarboxylate metabolism	Citrate cycle (TCA cycle, Krebs cycle) | Citrate cycle, first carbon oxidation, oxaloacetate => 2-oxoglutarate | Glyoxylate cycle | Methylaspartate cycle	peak in Late Summer	mostly peak in Late Summer	appear in many years, and disappear in some years
K01674	cah; carbonic anhydrase [EC:4.2.1.1]	Energy metabolism	Nitrogen metabolism		peak in Clearwater and Early Summer	no constant pattern for each year	appear in many years, and disappear in some years
K01728	pel; pectate lyase [EC:4.2.2.2]	Carbohydrate metabolism	Pentose and glucuronate interconversions		peak in Early Summer and Late Summer	mostly peak in Early Summer and Late Summer, seems to be biased due to high KO abundance in Ice-on in 2018	appear in many years, and disappear in some years
K02108	ATPF0A, atpB; F-type H+-transporting ATPase subunit a	Energy metabolism | Energy metabolism	Oxidative phosphorylation | Photosynthesis	F-type ATPase, prokaryotes and chloroplasts	peak in Early Summer	peak in Early Summer in 2015	appear less frequently, overall pattern was mostly based on one or few years
K02114	ATPF1E, atpC; F-type H+-transporting ATPase subunit epsilon	Energy metabolism | Energy metabolism	Oxidative phosphorylation | Photosynthesis	F-type ATPase, prokaryotes and chloroplasts	peak in Late Summer	peak in Early Summer in 2006, peak in Fall in 2012, peak in Fall in 2015, peak in Late Summer in 2018	appear in many years, and disappear in some years
K02115	ATPF1G, atpG; F-type H+-transporting ATPase subunit gamma	Energy metabolism | Energy metabolism	Oxidative phosphorylation | Photosynthesis	F-type ATPase, prokaryotes and chloroplasts	peak in Late Summer	peak in Late Summer in 2014	appear less frequently, overall pattern was mostly based on one or few years
K02133	ATPeF1B, ATP5B, ATP2; F-type H+-transporting ATPase subunit beta [EC:7.1.2.2]	Energy metabolism	Oxidative phosphorylation	F-type ATPase, eukaryotes	peak in Late Summer	peak in Late Summer in 2013	appear less frequently, overall pattern was mostly based on one or few years
K02284	cpcA; phycocyanin alpha chain	Energy metabolism	Photosynthesis - antenna proteins		peak in Early Summer and Ice-on	mostly peak in Early Summer, seems to be biased due to high KO abundance in Ice-on in 2005	appear in some years, and disappear in some years
K02439	glpE; thiosulfate sulfurtransferase [EC:2.8.1.1]	Energy metabolism	Sulfur metabolism		peak in Spring	many peak in Spring	appear in many years, and disappear in some years
K02629	pecB; phycoerythrocyanin beta chain	Energy metabolism	Photosynthesis - antenna proteins		peak in Early Summer and Fall	peak in Early Summer in 2003, peak in Fall in 2009	appear less frequently, overall pattern was mostly based on one or few years
K02691	psaC; photosystem I subunit VII	Energy metabolism	Photosynthesis	Photosystem I	peak in Spring	peak in Spring in 2015	appear less frequently, overall pattern was mostly based on one or few years
K02692	psaD; photosystem I subunit II	Energy metabolism	Photosynthesis	Photosystem I	peak in Early Summer	peak in Early Summer in 2008	appear less frequently, overall pattern was mostly based on one or few years
K03636	moaD, cysO; sulfur-carrier protein	Folding, sorting and degradation	Sulfur relay system		peak in Fall	peak in Fall in 2016, peak in Fall in 2017, peak in Late Summer in 2018	appear less frequently, overall pattern was mostly based on one or few years
K03782	katG; catalase-peroxidase [EC:1.11.1.21]	Amino acid metabolism | Amino acid metabolism | Biosynthesis of other secondary metabolites | Xenobiotics biodegradation and metabolism	Phenylalanine metabolism | Tryptophan metabolism | Phenylpropanoid biosynthesis | Drug metabolism - other enzymes		peak in Clearwater and Early Summer	many peak in Clearwater and Early Summer	appear in many years, and disappear in some years
K04073	mhpF; acetaldehyde dehydrogenase [EC:1.2.1.10]	Amino acid metabolism | Xenobiotics biodegradation and metabolism | Carbohydrate metabolism | Xenobiotics biodegradation and metabolism | Xenobiotics biodegradation and metabolism | Carbohydrate metabolism	Phenylalanine metabolism | Benzoate degradation | Pyruvate metabolism | Dioxin degradation | Xylene degradation | Butanoate metabolism	Trans-cinnamate degradation, trans-cinnamate => acetyl-CoA | Catechol meta-cleavage, catechol => acetyl-CoA / 4-methylcatechol => propanoyl-CoA	peak in Fall and Ice-on	many peak in Fall and Ice-on	appear less frequently, overall pattern was mostly based on one or few years
K04618	GAOA; galactose oxidase [EC:1.1.3.9]	Carbohydrate metabolism	Galactose metabolism		peak in Fall	many peak in Fall	appear in many years, and disappear in some years
K05396	dcyD; D-cysteine desulfhydrase [EC:4.4.1.15]	Amino acid metabolism	Cysteine and methionine metabolism		peak in Spring and Fall	many peak in Fall, seems to be biased due to high KO abundance in Ice-on in 2015	appear in many years, and disappear in some years
K08352	phsA, psrA; thiosulfate reductase / polysulfide reductase chain A [EC:1.8.5.5]	Energy metabolism	Sulfur metabolism		peak in Fall	peak in Fall in 2002, peak in Fall in 2008, peak in Fall in 2014	appear less frequently, overall pattern was mostly based on one or few years
K11717	sufS; cysteine desulfurase / selenocysteine lyase [EC:2.8.1.7 4.4.1.16]	Metabolism of other amino acids	Selenocompound metabolism		peak in Spring, Late Summer, and Ice-on	many peak in Late Summer	appear in many years, and disappear in some years
K13953	adhP; alcohol dehydrogenase, propanol-preferring [EC:1.1.1.1]	Carbohydrate metabolism | Lipid metabolism | Amino acid metabolism | Xenobiotics biodegradation and metabolism | Xenobiotics biodegradation and metabolism | Metabolism of cofactors and vitamins | Xenobiotics biodegradation and metabolism | Xenobiotics biodegradation and metabolism	Glycolysis / Gluconeogenesis | Fatty acid degradation | Tyrosine metabolism | Chloroalkane and chloroalkene degradation | Naphthalene degradation | Retinol metabolism | Metabolism of xenobiotics by cytochrome P450 | Drug metabolism - cytochrome P450		peak in Late Summer and Ice-on	many peak in Late Summer and Ice-on	appear in many years, and disappear in some years
K15234	ccl; citryl-CoA lyase [EC:4.1.3.34]	Energy metabolism	Carbon fixation pathways in prokaryotes	Reductive citrate cycle (Arnon-Buchanan cycle)	peak in Early Summer	many peak in Early Summer	appear in some years, and disappear in some years
K17230	fccA; cytochrome subunit of sulfide dehydrogenase	Energy metabolism	Sulfur metabolism		peak in Early Summer	peak in Early Summer in 2000, peak in Early Summer in 2002, peak in Clearwater in 2011	appear less frequently, overall pattern was mostly based on one or few years
K18372	acmB; methyl acetate hydrolase [EC:3.1.1.-]	Carbohydrate metabolism	Propanoate metabolism		peak in Clearwater and Ice-on	peak in Clearwater in 2002, peak in Ice-on in 2019	appear less frequently, overall pattern was mostly based on one or few years
K19267	qorB; NAD(P)H dehydrogenase (quinone) [EC:1.6.5.2]	Metabolism of cofactors and vitamins	Ubiquinone and other terpenoid-quinone biosynthesis		peak in Late Summer	peak in Late Summer in 2008, peak in Late Summer in 2015	appear less frequently, overall pattern was mostly based on one or few years
K19285	nfrA1; FMN reductase (NADPH) [EC:1.5.1.38]	Metabolism of cofactors and vitamins	Riboflavin metabolism		peak in Spring and Clearwater	peak in Spring in 2016, peak in Clearwater in 2015	appear less frequently, overall pattern was mostly based on one or few years
K19551	pelC; pectate lyase C [EC:4.2.2.2 4.2.2.10]	Carbohydrate metabolism	Pentose and glucuronate interconversions		peak in Early Summer	seems to be biased due to high KO abundance in Clearwater in 2008	appear less frequently, overall pattern was mostly based on one or few years
K22516	fdhA; formate dehydrogenase (coenzyme F420) alpha subunit [EC:1.17.98.3 1.8.98.6]	Energy metabolism	Methane metabolism	Methanogenesis, methanol => methane | Methanogenesis, acetate => methane | Methanogenesis, methylamine/dimethylamine/trimethylamine => methane | Methanogenesis, CO2 => methane	peak in Fall	peak in Fall in 2007	appear less frequently, overall pattern was mostly based on one or few years
K22622	soxD; S-disulfanyl-L-cysteine oxidoreductase SoxD [EC:1.8.2.6]	Energy metabolism	Sulfur metabolism	Thiosulfate oxidation by SOX complex, thiosulfate => sulfate	peak in Early and Fall	peak in Early Summer in 2000, peak in Early Summer in 2002, peak in Fall in 2009, peak in Late Summer, 2015	appear less frequently, overall pattern was mostly based on one or few years
K22899	vnfH; vanadium nitrogenase iron protein	Energy metabolism	Nitrogen metabolism	Nirogen fixation	peak in Late Summer	peak in Late Summer in 2006	appear less frequently, overall pattern was mostly based on one or few years
Sub-table 2. Other AMG clusters that appear very frequently beyond AMG clusters listed in Sub-table 1 (also have high AMG cluster abundance)
KO	KO details	Metabolisms (mutiple metabolisms separated by '|')	Pathways (mutiple pathways separated by '|')	Module (mutiple pathways separated by '|')
K00001	E1.1.1.1, adh; alcohol dehydrogenase [EC:1.1.1.1]	Carbohydrate metabolism | Lipid metabolism | Amino acid metabolism | Xenobiotics biodegradation and metabolism | Xenobiotics biodegradation and metabolism | Metabolism of cofactors and vitamins | Xenobiotics biodegradation and metabolism | Xenobiotics biodegradation and metabolism	Glycolysis / Gluconeogenesis | Fatty acid degradation | Tyrosine metabolism | Chloroalkane and chloroalkene degradation | Naphthalene degradation | Retinol metabolism | Metabolism of xenobiotics by cytochrome P450 | Drug metabolism - cytochrome P450
K00008	SORD, gutB; L-iditol 2-dehydrogenase [EC:1.1.1.14]	Carbohydrate metabolism | Carbohydrate metabolism	Pentose and glucuronate interconversions | Fructose and mannose metabolism	Glucuronate pathway (uronate pathway)
K00012	UGDH, ugd; UDPglucose 6-dehydrogenase [EC:1.1.1.22]	Carbohydrate metabolism | Carbohydrate metabolism | Carbohydrate metabolism	Pentose and glucuronate interconversions | Ascorbate and aldarate metabolism | Amino sugar and nucleotide sugar metabolism	Ascorbate biosynthesis, animals, glucose-1P => ascorbate | Glucuronate pathway (uronate pathway) | Nucleotide sugar biosynthesis, eukaryotes | Nucleotide sugar biosynthesis, prokaryotes
K00014	aroE; shikimate dehydrogenase [EC:1.1.1.25]	Amino acid metabolism	Phenylalanine, tyrosine and tryptophan biosynthesis	Shikimate pathway, phosphoenolpyruvate + erythrose-4P => chorismate
K00033	PGD, gnd, gntZ; 6-phosphogluconate dehydrogenase [EC:1.1.1.44 1.1.1.343]	Carbohydrate metabolism | Metabolism of other amino acids	Pentose phosphate pathway | Glutathione metabolism	Pentose phosphate pathway (Pentose phosphate cycle) | Pentose phosphate pathway, oxidative phase, glucose 6P => ribulose 5P
K00036	G6PD, zwf; glucose-6-phosphate 1-dehydrogenase [EC:1.1.1.49 1.1.1.363]	Carbohydrate metabolism | Metabolism of other amino acids	Pentose phosphate pathway | Glutathione metabolism	Entner-Doudoroff pathway, glucose-6P => glyceraldehyde-3P + pyruvate | Pentose phosphate pathway (Pentose phosphate cycle) | Pentose phosphate pathway, oxidative phase, glucose 6P => ribulose 5P
K00058	serA, PHGDH; D-3-phosphoglycerate dehydrogenase / 2-oxoglutarate reductase [EC:1.1.1.95 1.1.1.399]	Amino acid metabolism | Amino acid metabolism | Energy metabolism	Glycine, serine and threonine metabolism | Cysteine and methionine metabolism | Methane metabolism	Serine biosynthesis, glycerate-3P => serine
K00059	fabG, OAR1; 3-oxoacyl-[acyl-carrier protein] reductase [EC:1.1.1.100]	Lipid metabolism | Biosynthesis of other secondary metabolites | Metabolism of cofactors and vitamins	Fatty acid biosynthesis | Prodigiosin biosynthesis | Biotin metabolism	Fatty acid biosynthesis, elongation | Pimeloyl-ACP biosynthesis, BioC-BioH pathway, malonyl-ACP => pimeloyl-ACP
K00067	rfbD, rmlD; dTDP-4-dehydrorhamnose reductase [EC:1.1.1.133]	Biosynthesis of other secondary metabolites | Metabolism of terpenoids and polyketides	Streptomycin biosynthesis | Polyketide sugar unit biosynthesis	dTDP-L-rhamnose biosynthesis
K00121	frmA, ADH5, adhC; S-(hydroxymethyl)glutathione dehydrogenase / alcohol dehydrogenase [EC:1.1.1.284 1.1.1.1]	Carbohydrate metabolism | Lipid metabolism | Amino acid metabolism | Xenobiotics biodegradation and metabolism | Xenobiotics biodegradation and metabolism | Energy metabolism | Metabolism of cofactors and vitamins | Xenobiotics biodegradation and metabolism | Xenobiotics biodegradation and metabolism	Glycolysis / Gluconeogenesis | Fatty acid degradation | Tyrosine metabolism | Chloroalkane and chloroalkene degradation | Naphthalene degradation | Methane metabolism | Retinol metabolism | Metabolism of xenobiotics by cytochrome P450 | Drug metabolism - cytochrome P450
K00274	MAO, aofH; monoamine oxidase [EC:1.4.3.4]	Amino acid metabolism | Amino acid metabolism | Amino acid metabolism | Amino acid metabolism | Amino acid metabolism | Amino acid metabolism | Biosynthesis of other secondary metabolites | Xenobiotics biodegradation and metabolism	Glycine, serine and threonine metabolism | Arginine and proline metabolism | Histidine metabolism | Tyrosine metabolism | Phenylalanine metabolism | Tryptophan metabolism | Isoquinoline alkaloid biosynthesis | Drug metabolism - cytochrome P450	GABA biosynthesis, eukaryotes, putrescine => GABA
K00285	dadA; D-amino-acid dehydrogenase [EC:1.4.5.1]	Amino acid metabolism	Phenylalanine metabolism
K00355	NQO1; NAD(P)H dehydrogenase (quinone) [EC:1.6.5.2]	Metabolism of cofactors and vitamins	Ubiquinone and other terpenoid-quinone biosynthesis
K00432	gpx; glutathione peroxidase [EC:1.11.1.9]	Metabolism of other amino acids | Lipid metabolism	Glutathione metabolism | Arachidonic acid metabolism
K00472	P4HA; prolyl 4-hydroxylase [EC:1.14.11.2]	Amino acid metabolism	Arginine and proline metabolism
K00505	TYR; tyrosinase [EC:1.14.18.1]	Amino acid metabolism | Biosynthesis of other secondary metabolites | Biosynthesis of other secondary metabolites	Tyrosine metabolism | Isoquinoline alkaloid biosynthesis | Betalain biosynthesis	Catecholamine biosynthesis, tyrosine => dopamine => noradrenaline => adrenaline
K00507	SCD, desC; stearoyl-CoA desaturase (Delta-9 desaturase) [EC:1.14.19.1]	Lipid metabolism	Biosynthesis of unsaturated fatty acids
K00508	E1.14.19.3; linoleoyl-CoA desaturase [EC:1.14.19.3]	Lipid metabolism	Linoleic acid metabolism
K00542	GAMT; guanidinoacetate N-methyltransferase [EC:2.1.1.2]	Amino acid metabolism | Amino acid metabolism	Glycine, serine and threonine metabolism | Arginine and proline metabolism	Creatine pathway
K00568	ubiG; 2-polyprenyl-6-hydroxyphenyl methylase / 3-demethylubiquinone-9 3-methyltransferase [EC:2.1.1.222 2.1.1.64]	Metabolism of cofactors and vitamins	Ubiquinone and other terpenoid-quinone biosynthesis	Ubiquinone biosynthesis, prokaryotes, chorismate => ubiquinone
K00588	E2.1.1.104; caffeoyl-CoA O-methyltransferase [EC:2.1.1.104]	Biosynthesis of other secondary metabolites | Biosynthesis of other secondary metabolites | Biosynthesis of other secondary metabolites | Biosynthesis of other secondary metabolites	Phenylpropanoid biosynthesis | Flavonoid biosynthesis | Stilbenoid, diarylheptanoid and gingerol biosynthesis | Biosynthesis of secondary metabolites - unclassified	Capsaicin biosynthesis, L-Phenylalanine => Capsaicin | Monolignol biosynthesis, phenylalanine/tyrosine => monolignol
K00600	glyA, SHMT; glycine hydroxymethyltransferase [EC:2.1.2.1]	Amino acid metabolism | Metabolism of other amino acids | Carbohydrate metabolism | Metabolism of cofactors and vitamins | Energy metabolism	Glycine, serine and threonine metabolism | Cyanoamino acid metabolism | Glyoxylate and dicarboxylate metabolism | One carbon pool by folate | Methane metabolism	C1-unit interconversion, eukaryotes | C1-unit interconversion, prokaryotes | Formaldehyde assimilation, serine pathway | Photorespiration
K00602	purH; phosphoribosylaminoimidazolecarboxamide formyltransferase / IMP cyclohydrolase [EC:2.1.2.3 3.5.4.10]	Nucleotide metabolism | Metabolism of cofactors and vitamins	Purine metabolism | One carbon pool by folate	Inosine monophosphate biosynthesis, PRPP + glutamine => IMP
K00613	GATM; glycine amidinotransferase [EC:2.1.4.1]	Amino acid metabolism | Amino acid metabolism	Glycine, serine and threonine metabolism | Arginine and proline metabolism	Creatine pathway
K00615	E2.2.1.1, tktA, tktB; transketolase [EC:2.2.1.1]	Carbohydrate metabolism | Energy metabolism | Metabolism of terpenoids and polyketides	Pentose phosphate pathway | Carbon fixation in photosynthetic organisms | Biosynthesis of ansamycins	Pentose phosphate pathway (Pentose phosphate cycle) | Pentose phosphate pathway, non-oxidative phase, fructose 6P => ribose 5P | Reductive pentose phosphate cycle (Calvin cycle) | Reductive pentose phosphate cycle, glyceraldehyde-3P => ribulose-5P
K00616	E2.2.1.2, talA, talB; transaldolase [EC:2.2.1.2]	Carbohydrate metabolism	Pentose phosphate pathway	Pentose phosphate pathway (Pentose phosphate cycle) | Pentose phosphate pathway, non-oxidative phase, fructose 6P => ribose 5P
K00640	cysE; serine O-acetyltransferase [EC:2.3.1.30]	Amino acid metabolism | Energy metabolism	Cysteine and methionine metabolism | Sulfur metabolism	Cysteine biosynthesis, serine => cysteine
K00643	E2.3.1.37, ALAS; 5-aminolevulinate synthase [EC:2.3.1.37]	Amino acid metabolism | Metabolism of cofactors and vitamins	Glycine, serine and threonine metabolism | Porphyrin and chlorophyll metabolism
K00657	speG, SAT; diamine N-acetyltransferase [EC:2.3.1.57]	Amino acid metabolism	Arginine and proline metabolism	GABA biosynthesis, eukaryotes, putrescine => GABA
K00677	lpxA; UDP-N-acetylglucosamine acyltransferase [EC:2.3.1.129]	Glycan biosynthesis and metabolism	Lipopolysaccharide biosynthesis	Lipopolysaccharide biosynthesis, KDO2-lipid A
K00709	ABO; histo-blood group ABO system transferase [EC:2.4.1.40 2.4.1.37]	Glycan biosynthesis and metabolism	Glycosphingolipid biosynthesis - lacto and neolacto series
K00721	DPM1; dolichol-phosphate mannosyltransferase [EC:2.4.1.83]	Glycan biosynthesis and metabolism	N-Glycan biosynthesis
K00737	MGAT3; beta-1,4-mannosyl-glycoprotein beta-1,4-N-acetylglucosaminyltransferase [EC:2.4.1.144]	Glycan biosynthesis and metabolism	N-Glycan biosynthesis	N-glycan biosynthesis, complex type
K00764	purF, PPAT; amidophosphoribosyltransferase [EC:2.4.2.14]	Nucleotide metabolism | Amino acid metabolism	Purine metabolism | Alanine, aspartate and glutamate metabolism	Inosine monophosphate biosynthesis, PRPP + glutamine => IMP
K00789	metK; S-adenosylmethionine synthetase [EC:2.5.1.6]	Amino acid metabolism	Cysteine and methionine metabolism	Cysteine biosynthesis, methionine => cysteine | Ethylene biosynthesis, methionine => ethylene | Methionine degradation | Methionine salvage pathway
K00798	MMAB, pduO; cob(I)alamin adenosyltransferase [EC:2.5.1.17]	Metabolism of cofactors and vitamins	Porphyrin and chlorophyll metabolism	Cobalamin biosynthesis, cobinamide => cobalamin
K00812	aspB; aspartate aminotransferase [EC:2.6.1.1]	Amino acid metabolism | Amino acid metabolism | Amino acid metabolism | Amino acid metabolism | Amino acid metabolism | Amino acid metabolism | Amino acid metabolism | Biosynthesis of other secondary metabolites | Biosynthesis of other secondary metabolites | Biosynthesis of other secondary metabolites	Arginine biosynthesis | Alanine, aspartate and glutamate metabolism | Cysteine and methionine metabolism | Arginine and proline metabolism | Tyrosine metabolism | Phenylalanine metabolism | Phenylalanine, tyrosine and tryptophan biosynthesis | Novobiocin biosynthesis | Isoquinoline alkaloid biosynthesis | Tropane, piperidine and pyridine alkaloid biosynthesis
K00820	glmS, GFPT; glutamine---fructose-6-phosphate transaminase (isomerizing) [EC:2.6.1.16]	Amino acid metabolism | Carbohydrate metabolism	Alanine, aspartate and glutamate metabolism | Amino sugar and nucleotide sugar metabolism
K00852	rbsK, RBKS; ribokinase [EC:2.7.1.15]	Carbohydrate metabolism	Pentose phosphate pathway
K00855	PRK, prkB; phosphoribulokinase [EC:2.7.1.19]	Energy metabolism	Carbon fixation in photosynthetic organisms	Reductive pentose phosphate cycle (Calvin cycle) | Reductive pentose phosphate cycle, ribulose-5P => glyceraldehyde-3P
K00952	nadM; nicotinamide-nucleotide adenylyltransferase [EC:2.7.7.1]	Metabolism of cofactors and vitamins	Nicotinate and nicotinamide metabolism
K00966	GMPP; mannose-1-phosphate guanylyltransferase [EC:2.7.7.13]	Carbohydrate metabolism | Carbohydrate metabolism	Fructose and mannose metabolism | Amino sugar and nucleotide sugar metabolism	Ascorbate biosynthesis, plants, glucose-6P => ascorbate | Nucleotide sugar biosynthesis, eukaryotes | Nucleotide sugar biosynthesis, prokaryotes
K00969	nadD; nicotinate-nucleotide adenylyltransferase [EC:2.7.7.18]	Metabolism of cofactors and vitamins	Nicotinate and nicotinamide metabolism	NAD biosynthesis, aspartate => NAD
K00973	E2.7.7.24, rfbA, rffH; glucose-1-phosphate thymidylyltransferase [EC:2.7.7.24]	Biosynthesis of other secondary metabolites | Metabolism of terpenoids and polyketides | Biosynthesis of other secondary metabolites	Streptomycin biosynthesis | Polyketide sugar unit biosynthesis | Acarbose and validamycin biosynthesis	dTDP-L-rhamnose biosynthesis
K00979	kdsB; 3-deoxy-manno-octulosonate cytidylyltransferase (CMP-KDO synthetase) [EC:2.7.7.38]	Glycan biosynthesis and metabolism	Lipopolysaccharide biosynthesis	CMP-KDO biosynthesis
K00983	neuA; N-acylneuraminate cytidylyltransferase [EC:2.7.7.43]	Carbohydrate metabolism	Amino sugar and nucleotide sugar metabolism
K01046	lip, TGL2; triacylglycerol lipase [EC:3.1.1.3]	Lipid metabolism	Glycerolipid metabolism	Acylglycerol degradation
K01055	pcaD; 3-oxoadipate enol-lactonase [EC:3.1.1.24]	Xenobiotics biodegradation and metabolism	Benzoate degradation	Catechol ortho-cleavage, catechol => 3-oxoadipate
K01184	E3.2.1.15; polygalacturonase [EC:3.2.1.15]	Carbohydrate metabolism	Pentose and glucuronate interconversions	Pectin degradation
K01233	csn; chitosanase [EC:3.2.1.132]	Carbohydrate metabolism	Amino sugar and nucleotide sugar metabolism
K01243	mtnN, mtn, pfs; adenosylhomocysteine nucleosidase [EC:3.2.2.9]	Amino acid metabolism	Cysteine and methionine metabolism	Cysteine biosynthesis, methionine => cysteine | Methionine salvage pathway
K01251	E3.3.1.1, ahcY; adenosylhomocysteinase [EC:3.3.1.1]	Amino acid metabolism	Cysteine and methionine metabolism	Methionine degradation
K01270	pepD; dipeptidase D [EC:3.4.13.-]	Metabolism of other amino acids	Glutathione metabolism
K01458	hutG; N-formylglutamate deformylase [EC:3.5.1.68]	Amino acid metabolism | Carbohydrate metabolism	Histidine metabolism | Glyoxylate and dicarboxylate metabolism
K01460	gsp; glutathionylspermidine amidase/synthetase [EC:3.5.1.78 6.3.1.8]	Metabolism of other amino acids	Glutathione metabolism
K01491	folD; methylenetetrahydrofolate dehydrogenase (NADP+) / methenyltetrahydrofolate cyclohydrolase [EC:1.5.1.5 3.5.4.9]	Metabolism of cofactors and vitamins | Energy metabolism	One carbon pool by folate | Carbon fixation pathways in prokaryotes	C1-unit interconversion, prokaryotes | Reductive acetyl-CoA pathway (Wood-Ljungdahl pathway)
K01495	GCH1, folE; GTP cyclohydrolase IA [EC:3.5.4.16]	Metabolism of cofactors and vitamins	Folate biosynthesis	Tetrahydrofolate biosynthesis, GTP => THF
K01581	E4.1.1.17, ODC1, speC, speF; ornithine decarboxylase [EC:4.1.1.17]	Amino acid metabolism | Metabolism of other amino acids	Arginine and proline metabolism | Glutathione metabolism	Polyamine biosynthesis, arginine => ornithine => putrescine
K01601	rbcL; ribulose-bisphosphate carboxylase large chain [EC:4.1.1.39]	Carbohydrate metabolism | Energy metabolism	Glyoxylate and dicarboxylate metabolism | Carbon fixation in photosynthetic organisms	Photorespiration | Reductive pentose phosphate cycle (Calvin cycle) | Reductive pentose phosphate cycle, ribulose-5P => glyceraldehyde-3P
K01613	psd, PISD; phosphatidylserine decarboxylase [EC:4.1.1.65]	Lipid metabolism	Glycerophospholipid metabolism	Phosphatidylethanolamine (PE) biosynthesis, PA => PS => PE
K01619	deoC, DERA; deoxyribose-phosphate aldolase [EC:4.1.2.4]	Carbohydrate metabolism	Pentose phosphate pathway
K01627	kdsA; 2-dehydro-3-deoxyphosphooctonate aldolase (KDO 8-P synthase) [EC:2.5.1.55]	Glycan biosynthesis and metabolism	Lipopolysaccharide biosynthesis	CMP-KDO biosynthesis
K01628	fucA; L-fuculose-phosphate aldolase [EC:4.1.2.17]	Carbohydrate metabolism	Fructose and mannose metabolism
K01652	E2.2.1.6L, ilvB, ilvG, ilvI; acetolactate synthase I/II/III large subunit [EC:2.2.1.6]	Amino acid metabolism | Carbohydrate metabolism | Carbohydrate metabolism | Metabolism of cofactors and vitamins	Valine, leucine and isoleucine biosynthesis | Butanoate metabolism | C5-Branched dibasic acid metabolism | Pantothenate and CoA biosynthesis	Isoleucine biosynthesis, threonine => 2-oxobutanoate => isoleucine | Valine/isoleucine biosynthesis, pyruvate => valine / 2-oxobutanoate => isoleucine
K01654	E2.5.1.56, neuB; N-acetylneuraminate synthase [EC:2.5.1.56]	Carbohydrate metabolism	Amino sugar and nucleotide sugar metabolism
K01710	E4.2.1.46, rfbB, rffG; dTDP-glucose 4,6-dehydratase [EC:4.2.1.46]	Biosynthesis of other secondary metabolites | Metabolism of terpenoids and polyketides | Biosynthesis of other secondary metabolites | Metabolism of terpenoids and polyketides	Streptomycin biosynthesis | Polyketide sugar unit biosynthesis | Acarbose and validamycin biosynthesis | Biosynthesis of vancomycin group antibiotics	dTDP-L-rhamnose biosynthesis
K01711	gmd, GMDS; GDPmannose 4,6-dehydratase [EC:4.2.1.47]	Carbohydrate metabolism | Carbohydrate metabolism	Fructose and mannose metabolism | Amino sugar and nucleotide sugar metabolism
K01724	PCBD, phhB; 4a-hydroxytetrahydrobiopterin dehydratase [EC:4.2.1.96]	Metabolism of cofactors and vitamins	Folate biosynthesis
K01734	mgsA; methylglyoxal synthase [EC:4.2.3.3]	Carbohydrate metabolism	Propanoate metabolism
K01737	queD, ptpS, PTS; 6-pyruvoyltetrahydropterin/6-carboxytetrahydropterin synthase [EC:4.2.3.12 4.1.2.50]	Metabolism of cofactors and vitamins	Folate biosynthesis
K01756	purB, ADSL; adenylosuccinate lyase [EC:4.3.2.2]	Nucleotide metabolism | Amino acid metabolism	Purine metabolism | Alanine, aspartate and glutamate metabolism	Adenine ribonucleotide biosynthesis, IMP => ADP,ATP | Inosine monophosphate biosynthesis, PRPP + glutamine => IMP
K01784	galE, GALE; UDP-glucose 4-epimerase [EC:5.1.3.2]	Carbohydrate metabolism | Carbohydrate metabolism	Galactose metabolism | Amino sugar and nucleotide sugar metabolism	Galactose degradation, Leloir pathway, galactose => alpha-D-glucose-1P | Nucleotide sugar biosynthesis, eukaryotes | Nucleotide sugar biosynthesis, prokaryotes
K01790	rfbC, rmlC; dTDP-4-dehydrorhamnose 3,5-epimerase [EC:5.1.3.13]	Biosynthesis of other secondary metabolites | Metabolism of terpenoids and polyketides	Streptomycin biosynthesis | Polyketide sugar unit biosynthesis	dTDP-L-rhamnose biosynthesis
K01791	wecB; UDP-N-acetylglucosamine 2-epimerase (non-hydrolysing) [EC:5.1.3.14]	Carbohydrate metabolism	Amino sugar and nucleotide sugar metabolism	Nucleotide sugar biosynthesis, prokaryotes
K01808	rpiB; ribose 5-phosphate isomerase B [EC:5.3.1.6]	Carbohydrate metabolism | Carbohydrate metabolism | Energy metabolism	Pentose phosphate pathway | Fructose and mannose metabolism | Carbon fixation in photosynthetic organisms	Pentose phosphate pathway (Pentose phosphate cycle) | Pentose phosphate pathway, non-oxidative phase, fructose 6P => ribose 5P | Reductive pentose phosphate cycle (Calvin cycle) | Reductive pentose phosphate cycle, glyceraldehyde-3P => ribulose-5P
K01854	glf; UDP-galactopyranose mutase [EC:5.4.99.9]	Carbohydrate metabolism | Carbohydrate metabolism	Galactose metabolism | Amino sugar and nucleotide sugar metabolism
K01858	INO1, ISYNA1; myo-inositol-1-phosphate synthase [EC:5.5.1.4]	Biosynthesis of other secondary metabolites | Carbohydrate metabolism	Streptomycin biosynthesis | Inositol phosphate metabolism
K01885	EARS, gltX; glutamyl-tRNA synthetase [EC:6.1.1.17]	Metabolism of cofactors and vitamins	Porphyrin and chlorophyll metabolism	Aminoacyl-tRNA biosynthesis, eukaryotes | Aminoacyl-tRNA biosynthesis, prokaryotes | Heme biosynthesis, glutamate => protoheme/siroheme
K01915	glnA, GLUL; glutamine synthetase [EC:6.3.1.2]	Amino acid metabolism | Amino acid metabolism | Carbohydrate metabolism | Energy metabolism	Arginine biosynthesis | Alanine, aspartate and glutamate metabolism | Glyoxylate and dicarboxylate metabolism | Nitrogen metabolism
K01933	purM; phosphoribosylformylglycinamidine cyclo-ligase [EC:6.3.3.1]	Nucleotide metabolism	Purine metabolism	Inosine monophosphate biosynthesis, PRPP + glutamine => IMP
K01939	purA, ADSS; adenylosuccinate synthase [EC:6.3.4.4]	Nucleotide metabolism | Amino acid metabolism	Purine metabolism | Alanine, aspartate and glutamate metabolism	Adenine ribonucleotide biosynthesis, IMP => ADP,ATP
K01953	asnB, ASNS; asparagine synthase (glutamine-hydrolysing) [EC:6.3.5.4]	Amino acid metabolism	Alanine, aspartate and glutamate metabolism
K01955	carB, CPA2; carbamoyl-phosphate synthase large subunit [EC:6.3.5.5]	Nucleotide metabolism | Amino acid metabolism	Pyrimidine metabolism | Alanine, aspartate and glutamate metabolism	Uridine monophosphate biosynthesis, glutamine (+ PRPP) => UMP
K02078	acpP; acyl carrier protein	Biosynthesis of other secondary metabolites	Biosynthesis of secondary metabolites - other antibiotics
K02169	bioC; malonyl-CoA O-methyltransferase [EC:2.1.1.197]	Metabolism of cofactors and vitamins	Biotin metabolism	Pimeloyl-ACP biosynthesis, BioC-BioH pathway, malonyl-ACP => pimeloyl-ACP
K02377	TSTA3, fcl; GDP-L-fucose synthase [EC:1.1.1.271]	Carbohydrate metabolism | Carbohydrate metabolism	Fructose and mannose metabolism | Amino sugar and nucleotide sugar metabolism
K02472	wecC; UDP-N-acetyl-D-mannosaminuronic acid dehydrogenase [EC:1.1.1.336]	Carbohydrate metabolism	Amino sugar and nucleotide sugar metabolism
K02473	wbpP; UDP-N-acetylglucosamine 4-epimerase [EC:5.1.3.7]	Carbohydrate metabolism	Amino sugar and nucleotide sugar metabolism
K02536	lpxD; UDP-3-O-[3-hydroxymyristoyl] glucosamine N-acyltransferase [EC:2.3.1.191]	Glycan biosynthesis and metabolism	Lipopolysaccharide biosynthesis	Lipopolysaccharide biosynthesis, KDO2-lipid A
K02841	waaC, rfaC; heptosyltransferase I [EC:2.4.-.-]	Glycan biosynthesis and metabolism	Lipopolysaccharide biosynthesis	Lipopolysaccharide biosynthesis, inner core => outer core => O-antigen
K02843	waaF, rfaF; heptosyltransferase II [EC:2.4.-.-]	Glycan biosynthesis and metabolism	Lipopolysaccharide biosynthesis	Lipopolysaccharide biosynthesis, inner core => outer core => O-antigen
K02844	waaG, rfaG; UDP-glucose:(heptosyl)LPS alpha-1,3-glucosyltransferase [EC:2.4.1.-]	Glycan biosynthesis and metabolism	Lipopolysaccharide biosynthesis	Lipopolysaccharide biosynthesis, inner core => outer core => O-antigen
K02849	waaQ, rfaQ; heptosyltransferase III [EC:2.4.-.-]	Glycan biosynthesis and metabolism	Lipopolysaccharide biosynthesis	Lipopolysaccharide biosynthesis, inner core => outer core => O-antigen
K03183	ubiE; demethylmenaquinone methyltransferase / 2-methoxy-6-polyprenyl-1,4-benzoquinol methylase [EC:2.1.1.163 2.1.1.201]	Metabolism of cofactors and vitamins	Ubiquinone and other terpenoid-quinone biosynthesis	Menaquinone biosynthesis, chorismate => menaquinone | Ubiquinone biosynthesis, prokaryotes, chorismate => ubiquinone
K03269	lpxH; UDP-2,3-diacylglucosamine hydrolase [EC:3.6.1.54]	Glycan biosynthesis and metabolism	Lipopolysaccharide biosynthesis	Lipopolysaccharide biosynthesis, KDO2-lipid A
K03270	kdsC; 3-deoxy-D-manno-octulosonate 8-phosphate phosphatase (KDO 8-P phosphatase) [EC:3.1.3.45]	Glycan biosynthesis and metabolism	Lipopolysaccharide biosynthesis	CMP-KDO biosynthesis
K03271	gmhA, lpcA; D-sedoheptulose 7-phosphate isomerase [EC:5.3.1.28]	Glycan biosynthesis and metabolism	Lipopolysaccharide biosynthesis	ADP-L-glycero-D-manno-heptose biosynthesis
K03272	gmhC, hldE, waaE, rfaE; D-beta-D-heptose 7-phosphate kinase / D-beta-D-heptose 1-phosphate adenosyltransferase [EC:2.7.1.167 2.7.7.70]	Glycan biosynthesis and metabolism	Lipopolysaccharide biosynthesis	ADP-L-glycero-D-manno-heptose biosynthesis
K03273	gmhB; D-glycero-D-manno-heptose 1,7-bisphosphate phosphatase [EC:3.1.3.82 3.1.3.83]	Glycan biosynthesis and metabolism	Lipopolysaccharide biosynthesis	ADP-L-glycero-D-manno-heptose biosynthesis
K03274	gmhD, rfaD; ADP-L-glycero-D-manno-heptose 6-epimerase [EC:5.1.3.20]	Glycan biosynthesis and metabolism	Lipopolysaccharide biosynthesis	ADP-L-glycero-D-manno-heptose biosynthesis
K03275	waaO, rfaI; UDP-glucose:(glucosyl)LPS alpha-1,3-glucosyltransferase [EC:2.4.1.-]	Glycan biosynthesis and metabolism	Lipopolysaccharide biosynthesis
K03639	moaA, CNX2; GTP 3',8-cyclase [EC:4.1.99.22]	Metabolism of cofactors and vitamins | Folding, sorting and degradation	Folate biosynthesis | Sulfur relay system
K03897	iucD; lysine N6-hydroxylase [EC:1.14.13.59]	Amino acid metabolism	Lysine degradation
K04034	bchE; anaerobic magnesium-protoporphyrin IX monomethyl ester cyclase [EC:1.21.98.3]	Metabolism of cofactors and vitamins	Porphyrin and chlorophyll metabolism
K04042	glmU; bifunctional UDP-N-acetylglucosamine pyrophosphorylase / Glucosamine-1-phosphate N-acetyltransferase [EC:2.7.7.23 2.3.1.157]	Carbohydrate metabolism	Amino sugar and nucleotide sugar metabolism	Nucleotide sugar biosynthesis, prokaryotes
K04487	iscS, NFS1; cysteine desulfurase [EC:2.8.1.7]	Metabolism of cofactors and vitamins | Folding, sorting and degradation	Thiamine metabolism | Sulfur relay system
K05275	E1.1.1.65; pyridoxine 4-dehydrogenase [EC:1.1.1.65]	Metabolism of cofactors and vitamins	Vitamin B6 metabolism
K05535	MNN2; alpha 1,2-mannosyltransferase [EC:2.4.1.-]	Glycan biosynthesis and metabolism	Various types of N-glycan biosynthesis	N-glycan biosynthesis, high-mannose type
K05714	mhpC; 2-hydroxy-6-oxonona-2,4-dienedioate hydrolase [EC:3.7.1.14]	Amino acid metabolism	Phenylalanine metabolism	Trans-cinnamate degradation, trans-cinnamate => acetyl-CoA
K06041	kdsD, kpsF; arabinose-5-phosphate isomerase [EC:5.3.1.13]	Glycan biosynthesis and metabolism	Lipopolysaccharide biosynthesis	CMP-KDO biosynthesis
K06167	phnP; phosphoribosyl 1,2-cyclic phosphate phosphodiesterase [EC:3.1.4.55]	Metabolism of other amino acids	Phosphonate and phosphinate metabolism
K06211	nadR; HTH-type transcriptional regulator, transcriptional repressor of NAD biosynthesis genes [EC:2.7.7.1 2.7.1.22]	Metabolism of cofactors and vitamins	Nicotinate and nicotinamide metabolism
K06720	ectC; L-ectoine synthase [EC:4.2.1.108]	Amino acid metabolism	Glycine, serine and threonine metabolism	Ectoine biosynthesis, aspartate => ectoine
K06859	pgi1; glucose-6-phosphate isomerase, archaeal [EC:5.3.1.9]	Carbohydrate metabolism | Carbohydrate metabolism | Carbohydrate metabolism | Carbohydrate metabolism	Glycolysis / Gluconeogenesis | Pentose phosphate pathway | Starch and sucrose metabolism | Amino sugar and nucleotide sugar metabolism	Ascorbate biosynthesis, plants, glucose-6P => ascorbate | Glycolysis (Embden-Meyerhof pathway), glucose => pyruvate | Pentose phosphate pathway (Pentose phosphate cycle)
K06879	queF; 7-cyano-7-deazaguanine reductase [EC:1.7.1.13]	Metabolism of cofactors and vitamins	Folate biosynthesis
K06920	queC; 7-cyano-7-deazaguanine synthase [EC:6.3.4.20]	Metabolism of cofactors and vitamins	Folate biosynthesis
K07260	vanY; zinc D-Ala-D-Ala carboxypeptidase [EC:3.4.17.14]	Glycan biosynthesis and metabolism	Peptidoglycan biosynthesis	Vancomycin resistance, D-Ala-D-Lac type
K07404	pgl; 6-phosphogluconolactonase [EC:3.1.1.31]	Carbohydrate metabolism	Pentose phosphate pathway	Entner-Doudoroff pathway, glucose-6P => glyceraldehyde-3P + pyruvate | Pentose phosphate pathway (Pentose phosphate cycle) | Pentose phosphate pathway, oxidative phase, glucose 6P => ribulose 5P
K08256	pimA; phosphatidyl-myo-inositol alpha-mannosyltransferase [EC:2.4.1.345]	Glycan biosynthesis and metabolism	Lipoarabinomannan (LAM) biosynthesis
K08281	pncA; nicotinamidase/pyrazinamidase [EC:3.5.1.19 3.5.1.-]	Metabolism of cofactors and vitamins	Nicotinate and nicotinamide metabolism
K08310	nudB, ntpA; dihydroneopterin triphosphate diphosphatase [EC:3.6.1.67]	Metabolism of cofactors and vitamins	Folate biosynthesis
K08678	UXS1, uxs; UDP-glucuronate decarboxylase [EC:4.1.1.35]	Carbohydrate metabolism	Amino sugar and nucleotide sugar metabolism	Nucleotide sugar biosynthesis, eukaryotes
K08679	E5.1.3.6; UDP-glucuronate 4-epimerase [EC:5.1.3.6]	Carbohydrate metabolism	Amino sugar and nucleotide sugar metabolism
K09007	folE2; GTP cyclohydrolase IB [EC:3.5.4.16]	Metabolism of cofactors and vitamins	Folate biosynthesis	Tetrahydrofolate biosynthesis, GTP => THF
K09457	queF; 7-cyano-7-deazaguanine reductase [EC:1.7.1.13]	Metabolism of cofactors and vitamins	Folate biosynthesis
K09458	fabF, OXSM, CEM1; 3-oxoacyl-[acyl-carrier-protein] synthase II [EC:2.3.1.179]	Lipid metabolism | Metabolism of cofactors and vitamins	Fatty acid biosynthesis | Biotin metabolism	Fatty acid biosynthesis, elongation | Pimeloyl-ACP biosynthesis, BioC-BioH pathway, malonyl-ACP => pimeloyl-ACP
K09474	phoN; acid phosphatase (class A) [EC:3.1.3.2]	Metabolism of cofactors and vitamins	Riboflavin metabolism
K09673	CHST9; carbohydrate 4-sulfotransferase 9 [EC:2.8.2.-]	Glycan biosynthesis and metabolism	Various types of N-glycan biosynthesis
K10011	arnA, pmrI; UDP-4-amino-4-deoxy-L-arabinose formyltransferase / UDP-glucuronic acid dehydrogenase (UDP-4-keto-hexauronic acid decarboxylating) [EC:2.1.2.13 1.1.1.305]	Carbohydrate metabolism	Amino sugar and nucleotide sugar metabolism	Cationic antimicrobial peptide (CAMP) resistance, arnBCADTEF operon | Undecaprenylphosphate alpha-L-Ara4N biosynthesis, UDP-GlcA => undecaprenyl phosphate alpha-L-Ara4N
K10026	queE; 7-carboxy-7-deazaguanine synthase [EC:4.3.99.3]	Metabolism of cofactors and vitamins	Folate biosynthesis
K11175	purN; phosphoribosylglycinamide formyltransferase 1 [EC:2.1.2.2]	Nucleotide metabolism | Metabolism of cofactors and vitamins	Purine metabolism | One carbon pool by folate	Inosine monophosphate biosynthesis, PRPP + glutamine => IMP
K11381	bkdA; 2-oxoisovalerate dehydrogenase E1 component [EC:1.2.4.4]	Amino acid metabolism | Carbohydrate metabolism	Valine, leucine and isoleucine degradation | Propanoate metabolism	Leucine degradation, leucine => acetoacetate + acetyl-CoA
K12448	UXE, uxe; UDP-arabinose 4-epimerase [EC:5.1.3.5]	Carbohydrate metabolism	Amino sugar and nucleotide sugar metabolism
K12450	RHM; UDP-glucose 4,6-dehydratase [EC:4.2.1.76]	Carbohydrate metabolism	Amino sugar and nucleotide sugar metabolism
K12452	ascC, ddhC, rfbH; CDP-4-dehydro-6-deoxyglucose reductase, E1 [EC:1.17.1.1]	Carbohydrate metabolism	Amino sugar and nucleotide sugar metabolism
K12454	rfbE; CDP-paratose 2-epimerase [EC:5.1.3.10]	Carbohydrate metabolism	Amino sugar and nucleotide sugar metabolism
K12710	novU; C-methyltransferase [EC:2.1.1.-]	Metabolism of terpenoids and polyketides	Polyketide sugar unit biosynthesis	dTDP-beta-L-noviose biosynthesis
K13010	per, rfbE; perosamine synthetase [EC:2.6.1.102]	Carbohydrate metabolism	Amino sugar and nucleotide sugar metabolism
K13017	wbpE, wlbC; UDP-2-acetamido-2-deoxy-ribo-hexuluronate aminotransferase [EC:2.6.1.98]	Carbohydrate metabolism	Amino sugar and nucleotide sugar metabolism
K13317	eryBIII, tylCIII, tylC3; NDP-4-keto-2,6-dideoxyhexose 3-C-methyltransferase [EC:2.1.1.-]	Metabolism of terpenoids and polyketides	Polyketide sugar unit biosynthesis	dTDP-L-mycarose biosynthesis
K13522	K13522, nadM; bifunctional NMN adenylyltransferase/nudix hydrolase [EC:2.7.7.1 3.6.1.-]	Metabolism of cofactors and vitamins	Nicotinate and nicotinamide metabolism
K13677	dgs, bgsA; 1,2-diacylglycerol-3-alpha-glucose alpha-1,2-glucosyltransferase [EC:2.4.1.208]	Lipid metabolism	Glycerolipid metabolism
K14266	prnA, rebH, ktzQ; tryptophan 7-halogenase [EC:1.14.19.9]	Biosynthesis of other secondary metabolites	Staurosporine biosynthesis	Pyrrolnitrin biosynthesis, tryptophan => pyrrolnitrin | Rebeccamycin biosynthesis, tryptophan => rebeccamycin
K14335	pimC; alpha-1,6-mannosyltransferase [EC:2.4.1.-]	Glycan biosynthesis and metabolism	Lipoarabinomannan (LAM) biosynthesis
K14940	cofF; gamma-F420-2:alpha-L-glutamate ligase [EC:6.3.2.32]	Energy metabolism	Methane metabolism
K15359	hspA; 6-hydroxy-3-succinoylpyridine 3-monooxygenase [EC:1.14.13.163]	Metabolism of cofactors and vitamins	Nicotinate and nicotinamide metabolism	Nicotine degradation, pyrrolidine pathway, nicotine => succinate semialdehyde
K15634	gpmB; probable phosphoglycerate mutase [EC:5.4.2.12]	Carbohydrate metabolism | Amino acid metabolism | Energy metabolism	Glycolysis / Gluconeogenesis | Glycine, serine and threonine metabolism | Methane metabolism	Gluconeogenesis, oxaloacetate => fructose-6P | Glycolysis (Embden-Meyerhof pathway), glucose => pyruvate | Glycolysis, core module involving three-carbon compounds
K16011	algA, xanB, rfbA, wbpW, pslB; mannose-1-phosphate guanylyltransferase / mannose-6-phosphate isomerase [EC:2.7.7.13 5.3.1.8]	Carbohydrate metabolism | Carbohydrate metabolism	Fructose and mannose metabolism | Amino sugar and nucleotide sugar metabolism	Ascorbate biosynthesis, plants, glucose-6P => ascorbate | Nucleotide sugar biosynthesis, prokaryotes
K16066	ydfG; 3-hydroxy acid dehydrogenase / malonic semialdehyde reductase [EC:1.1.1.381 1.1.1.-]	Nucleotide metabolism | Amino acid metabolism	Pyrimidine metabolism | Glycine, serine and threonine metabolism
K16437	evaC; methylation protein EvaC	Metabolism of terpenoids and polyketides	Biosynthesis of vancomycin group antibiotics
K16870	wbbL; N-acetylglucosaminyl-diphospho-decaprenol L-rhamnosyltransferase [EC:2.4.1.289]	Glycan biosynthesis and metabolism	Arabinogalactan biosynthesis - Mycobacterium
K17398	DNMT3A; DNA (cytosine-5)-methyltransferase 3A [EC:2.1.1.37]	Amino acid metabolism	Cysteine and methionine metabolism	Methionine degradation
K17716	capD; UDP-glucose 4-epimerase [EC:5.1.3.2]	Carbohydrate metabolism | Carbohydrate metabolism	Galactose metabolism | Amino sugar and nucleotide sugar metabolism	Nucleotide sugar biosynthesis, prokaryotes
K18013	kce; 3-keto-5-aminohexanoate cleavage enzyme [EC:2.3.1.247]	Amino acid metabolism	Lysine degradation
K19002	mgs, bgsB; 1,2-diacylglycerol 3-alpha-glucosyltransferase [EC:2.4.1.337]	Lipid metabolism	Glycerolipid metabolism
K19200	IAL; isopenicillin-N N-acyltransferase like protein	Biosynthesis of other secondary metabolites	Penicillin and cephalosporin biosynthesis
K19668	CBH2, cbhA; cellulose 1,4-beta-cellobiosidase [EC:3.2.1.91]	Carbohydrate metabolism	Starch and sucrose metabolism
K20811	inuJ; inulosucrase [EC:2.4.1.9]	Carbohydrate metabolism	Starch and sucrose metabolism
K20844	abf1; non-reducing end alpha-L-arabinofuranosidase [EC:3.2.1.55]	Carbohydrate metabolism	Amino sugar and nucleotide sugar metabolism
K21029	moeB; molybdopterin-synthase adenylyltransferase [EC:2.7.7.80]	Folding, sorting and degradation	Sulfur relay system
K21140	mec; [CysO sulfur-carrier protein]-S-L-cysteine hydrolase [EC:3.13.1.6]	Folding, sorting and degradation	Sulfur relay system
K21224	kedN5; radical SAM C-methyltransferase	Metabolism of terpenoids and polyketides	Biosynthesis of enediyne antibiotics
K21328	calS13, atmS13; dTDP-4-amino-4,6-dideoxy-D-glucose/dTDP-4-amino-2,4-dideoxy-beta-L-xylose transaminase [EC:2.6.1.33 2.6.1.-]	Metabolism of terpenoids and polyketides	Polyketide sugar unit biosynthesis
K21344	rfaE1; D-glycero-beta-D-manno-heptose-7-phosphate kinase [EC:2.7.1.167]	Glycan biosynthesis and metabolism	Lipopolysaccharide biosynthesis	ADP-L-glycero-D-manno-heptose biosynthesis
K21480	HO, pbsA1, hmuO; heme oxygenase (biliverdin-producing, ferredoxin) [EC:1.14.15.20]	Metabolism of cofactors and vitamins	Porphyrin and chlorophyll metabolism
K22226	ahbC; Fe-coproporphyrin III synthase	Metabolism of cofactors and vitamins	Porphyrin and chlorophyll metabolism
K22316	rhnA-cobC; ribonuclease H / adenosylcobalamin/alpha-ribazole phosphatase [EC:3.1.26.4 3.1.3.73]	Metabolism of cofactors and vitamins	Porphyrin and chlorophyll metabolism
K23144	K23144; UDP-N-acetylglucosamine diphosphorylase / glucose-1-phosphate thymidylyltransferase / UDP-N-acetylgalactosamine diphosphorylase / glucosamine-1-phosphate N-acetyltransferase / galactosamine-1-phosphate N-acetyltransferase [EC:2.7.7.23 2.7.7.24 2.7.7.83 2.3.1.157 2.3.1.276]	Biosynthesis of other secondary metabolites | Metabolism of terpenoids and polyketides | Biosynthesis of other secondary metabolites	Streptomycin biosynthesis | Polyketide sugar unit biosynthesis | Acarbose and validamycin biosynthesis
